# Supplementary material for: Thermal properties and phase transition behaviors of possible caloric materials Bi0.95Ln0.05NiO3
Source: Royal Society of Chemistry journal article supplement (doi:10.1039/d3ta01259j), 2023-01-01
Supplement: d3ta01259j1.pdf [file d3ta01259j1.pdf]

## Electronic Supporting Information

### Thermal properties and phase transition behaviors of possible caloric materials $\text{Bi}_{0.95}\text{Ln}_{0.05}\text{NiO}_3$

Chen Chen,<sup>a</sup> Yoshihisa Kosugi,<sup>a</sup> Masato Goto,<sup>a</sup> and Yuichi Shimakawa<sup>\*\*a</sup>

<sup>a</sup>*Institute for Chemical Research, Kyoto University, Gokasho, Uji, Kyoto 611-0011, Japan*

This supporting information consists of the refined structure parameters of  $\text{Bi}_{0.95}\text{Nd}_{0.05}\text{NiO}_3$  at 450 K (Table S1) and 300 K (Table S2).

<sup>\*\*</sup>Corresponding author E-mail : [shimak@scl.kyoto-u.ac.jp](mailto:shimak@scl.kyoto-u.ac.jp)

**Table S1.** Structural data obtained from the Rietveld refinement for  $\text{Bi}_{0.95}\text{Nd}_{0.05}\text{NiO}_3$  at 450 K. Space group,  $Pnma$ ,  $a = 5.54766(5)$  Å,  $b = 7.66767(7)$  Å,  $c = 5.35863(5)$  Å,  $\alpha = \beta = \gamma = 90^\circ$ , and  $R_{\text{wp}} = 11.7\%$ .

| Atom | $x$       | $y$      | $z$        | $g$  | $B$ (Å <sup>2</sup> ) |
|------|-----------|----------|------------|------|-----------------------|
| Bi1  | 0.0528(2) | 0.25     | -0.0081(3) | 0.95 | 0.72(2)               |
| Nd1  | 0.0528(2) | 0.25     | -0.0081(3) | 0.05 | 0.72(2)               |
| Ni1  | 0         | 0        | 0.5        | 1    | 0.28(4)               |
| O1   | 0.468(3)  | 0.25     | 0.088(3)   | 1    | 1.2(2)                |
| O2   | 0.299(2)  | 0.043(1) | 0.699(2)   | 1    | 1.2(2)                |

**Table S2.** Structural data obtained from the Rietveld refinement for  $\text{Bi}_{0.95}\text{Nd}_{0.05}\text{NiO}_3$  at 300 K. Space group,  $P\bar{1}$ ,  $a = 5.38711(5)$  Å,  $b = 5.64705(6)$  Å,  $c = 7.70295(8)$  Å,  $\alpha = 91.9456(6)^\circ$ ,  $\beta = 89.8400(7)^\circ$ ,  $\gamma = 91.5717(6)^\circ$ , and  $R_{\text{wp}}=8.9\%$ .

| Atom | $x$       | $y$       | $z$       | $g$  | $B$ (Å <sup>2</sup> ) |
|------|-----------|-----------|-----------|------|-----------------------|
| Bi1  | 0.0089(3) | 0.0500(2) | 0.2345(2) | 0.95 | 0.50(3)               |
| Nd1  | 0.0089(3) | 0.0500(2) | 0.2345(2) | 0.05 | 0.50(3)               |
| Bi2  | 0.5114(3) | 0.4420(2) | 0.7264(2) | 0.95 | 0.54(3)               |
| Nd2  | 0.5114(3) | 0.4420(2) | 0.7264(2) | 0.05 | 0.54(3)               |
| Ni1  | 0.5       | 0         | 0         | 1    | 0.39(5)               |
| Ni2  | 0         | 0.5       | 0         | 1    | 0.39(5)               |
| Ni3  | 0.5       | 0         | 0.5       | 1    | 0.39(5)               |
| Ni4  | 0         | 0.5       | 0.5       | 1    | 0.39(5)               |
| O1   | -0.144(4) | 0.462(3)  | 0.252(2)  | 1    | 0.5(2)                |
| O2   | 0.411(3)  | 0.078(3)  | 0.761(2)  | 1    | 0.5(2)                |
| O3   | 0.833(3)  | 0.176(3)  | -0.033(2) | 1    | 0.5(2)                |
| O4   | 0.314(4)  | 0.339(3)  | 0.078(2)  | 1    | 0.5(2)                |
| O5   | 0.213(3)  | 0.783(3)  | 0.412(2)  | 1    | 0.5(2)                |
| O6   | 0.678(4)  | 0.690(3)  | 0.543(2)  | 1    | 0.5(2)                |
